# Supplementary material
Source: PubMed Central journal article supplement (PMC11315224)
Supplement: NIHMS2014707-supplement-supp.pdf [file NIHMS2014707-supplement-supp.pdf]

## Supplemental Information

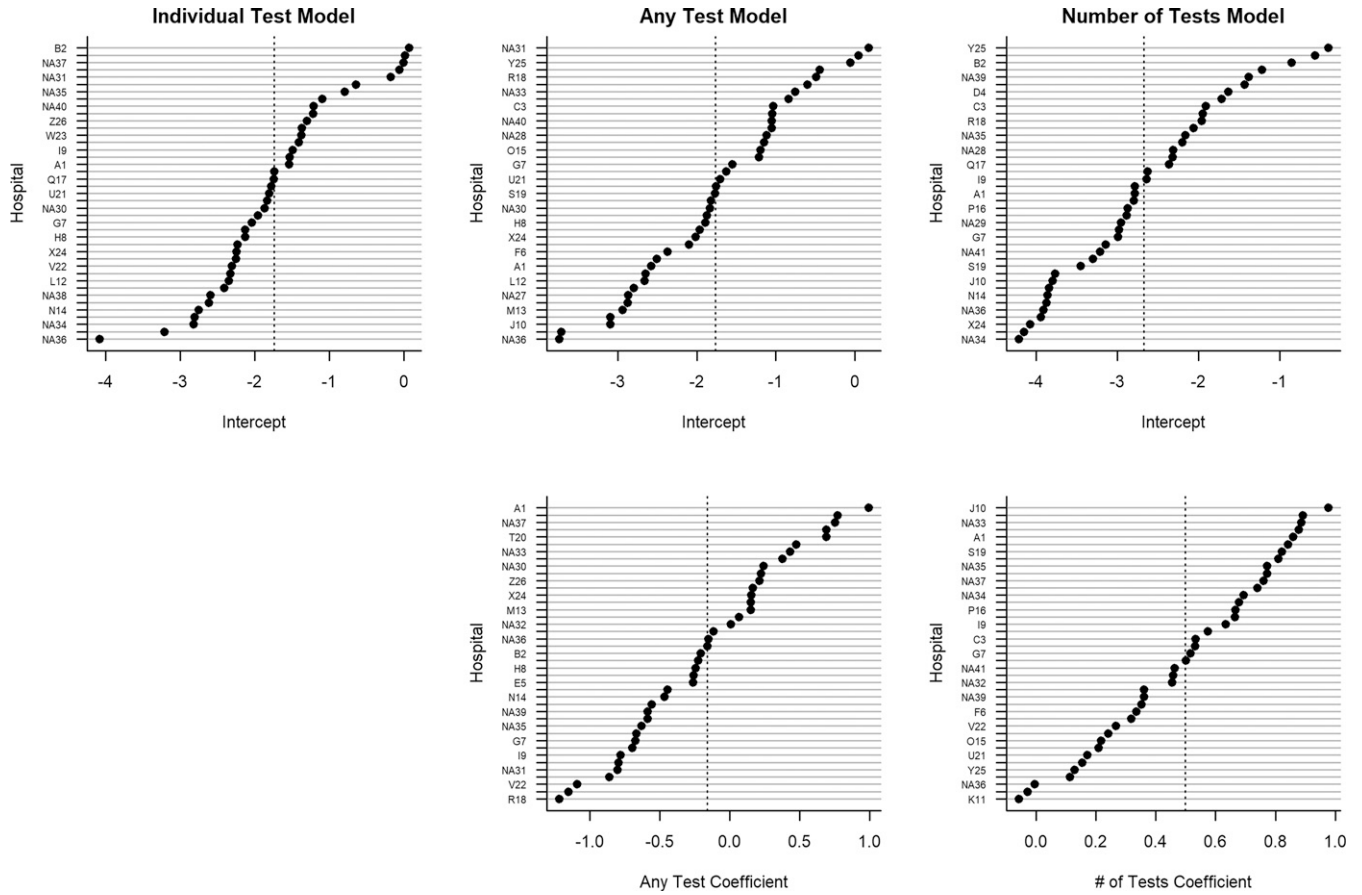

**SUPPLEMENTAL FIGURE 4** Variation in random effects across the 3 studied models. Each hospital is represented along the y-axis as a random alphanumeric code. Estimated fixed effects are the vertical dotted lines. The any test model had random intercepts (top center plot) and a random coefficient for the binary any test covariate (bottom center plot). The “number of tests” model had random intercepts (top right plot) and a random coefficient for the number of tests covariate (bottom right plot).

**SUPPLEMENTAL TABLE 4** International Classification of Disease, 10th Revision Definitions

| Code                                      | Explanation                                                                                                |
|-------------------------------------------|------------------------------------------------------------------------------------------------------------|
| Community acquired pneumonia <sup>a</sup> |                                                                                                            |
| A37.01                                    | Whooping cough due to <i>Bordetella pertussis</i> with pneumonia                                           |
| A37.11                                    | Whooping cough due to <i>Bordetella parapertussis</i> with pneumonia                                       |
| A37.81                                    | Whooping cough due to other <i>Bordetella</i> species with pneumonia                                       |
| A37.91                                    | Whooping cough, unspecified species with pneumonia                                                         |
| J10.00                                    | Influenza due to other identified influenza virus with unspecified type of pneumonia                       |
| J10.01                                    | Influenza due to other identified influenza virus with the same other identified influenza virus pneumonia |
| J10.08                                    | Influenza due to other identified influenza virus with other specified pneumonia                           |
| J11.00                                    | Influenza due to unidentified influenza virus with unspecified type of pneumonia                           |
| J11.08                                    | Influenza due to unidentified influenza virus with specified pneumonia                                     |
| J12.0                                     | Adenoviral pneumonia                                                                                       |
| J12.1                                     | Respiratory syncytial virus pneumonia                                                                      |
| J12.2                                     | Parainfluenza virus pneumonia                                                                              |
| J12.3                                     | Human metapneumovirus pneumonia                                                                            |
| J12.89                                    | Other viral pneumonia                                                                                      |
| J12.9                                     | Viral pneumonia, unspecified                                                                               |
| J13                                       | Pneumonia due to <i>Streptococcus pneumoniae</i>                                                           |
| J15.0                                     | Pneumonia due to <i>Klebsiella pneumoniae</i>                                                              |
| J15.211                                   | Pneumonia due to Methicillin susceptible <i>Staphylococcus aureus</i>                                      |
| J15.212                                   | Pneumonia due to Methicillin resistant <i>Staphylococcus aureus</i>                                        |
| J15.4                                     | Pneumonia due to other streptococci                                                                        |
| J15.6                                     | Pneumonia due to other aerobic Gram-negative bacteria                                                      |
| J15.8                                     | Pneumonia due to other specified bacteria                                                                  |
| J15.9                                     | Unspecified bacterial pneumonia                                                                            |
| J16.8                                     | Pneumonia due to other specified infectious organisms                                                      |
| J18.0                                     | Bronchopneumonia, unspecified organism                                                                     |
| J18.1                                     | Lobar pneumonia, unspecified organism                                                                      |
| J18.8                                     | Other pneumonia, unspecified organism                                                                      |
| J18.9                                     | Pneumonia, unspecified organism                                                                            |
| Complicated pneumonia                     |                                                                                                            |
| J90                                       | Pleural effusion, not elsewhere classified                                                                 |
| J85                                       | Abscess of lung with pneumonia                                                                             |
| J86                                       | Pyothorax                                                                                                  |
| J91.0                                     | Malignant pleural effusion                                                                                 |
| J91.8                                     | Pleural effusion in other conditions classified elsewhere                                                  |
| J94.1                                     | Fibrothorax                                                                                                |
| J94.2                                     | Hemothorax                                                                                                 |
| J94.8                                     | Other specified pleural conditions                                                                         |
| J94.9                                     | Pleural condition, unspecified                                                                             |
| J96.00                                    | Acute respiratory failure, unspecified whether with hypoxia or hypercapnia                                 |
| J96.90                                    | Respiratory failure, unspecified, unspecified whether with hypoxia or hypercapnia                          |
| R09.1                                     | Pleurisy                                                                                                   |
| R09.2                                     | Respiratory arrest                                                                                         |
| R78.81                                    | Bacteremia                                                                                                 |
| SIRS or sepsis                            |                                                                                                            |
| A02.1                                     | <i>Salmonella</i> sepsis                                                                                   |
| A20.7                                     | Septicemic plague                                                                                          |

SUPPLEMENTAL TABLE 4 Continued

| Code          | Explanation                                                        |
|---------------|--------------------------------------------------------------------|
| A21.7         | Generalized tularemia                                              |
| A22.7         | Anthrax sepsis                                                     |
| A24.1         | Acute and fulminating melioidosis (melioidosis sepsis)             |
| A26.7         | Erysipelothrix sepsis                                              |
| A32.7         | Listerial sepsis                                                   |
| A39.2         | Acute meningococemia                                               |
| A39.3         | Chronic meningococemia                                             |
| A39.4         | Meningococemia, unspecified                                        |
| A40.0         | Sepsis due to <i>Streptococcus</i> , group A                       |
| A40.1         | Sepsis due to <i>Streptococcus</i> , group B                       |
| A40.3         | Sepsis due to <i>Streptococcus pneumoniae</i>                      |
| A40.8         | Other streptococcal sepsis                                         |
| A40.9         | Streptococcal sepsis, unspecified                                  |
| A41.01        | Sepsis due to Methicillin susceptible <i>Staphylococcus aureus</i> |
| A41.02        | Sepsis due to Methicillin resistant <i>Staphylococcus aureus</i>   |
| A41.1         | Sepsis due to other specified <i>Staphylococcus</i>                |
| A41.2         | Sepsis due to unspecified <i>Staphylococcus</i>                    |
| A41.3         | Sepsis due to <i>Hemophilus influenzae</i>                         |
| A41.4         | Sepsis due to anaerobes                                            |
| A41.50        | Gram-negative sepsis, unspecified                                  |
| A41.51        | Sepsis due to <i>Escherichia coli</i> [ <i>E. coli</i> ]           |
| A41.9         | Sepsis, unspecified organism                                       |
| A418.9        | Other specified sepsis                                             |
| R65.10        | SIRS of noninfectious origin without acute organ dysfunction.      |
| R65.11        | SIRS of noninfectious origin (without organ dysfunction)           |
| Severe sepsis |                                                                    |
| R65.20        | Severe sepsis without septic shock                                 |
| R65.21        | Severe sepsis with septic shock                                    |

SIRS, systemic inflammatory response syndrome.

<sup>a</sup> Derived from ICD-9 codes for community-acquired pneumonia described in Williams, et al.<sup>30</sup>

**SUPPLEMENTAL TABLE 5** Definitions Used for Interventions. Codes Are Either International Classification of Disease, 10<sup>th</sup> Revision Clinical Modification Diagnosis or Procedure Codes, or Clinical Transaction Classification Codes Used by the Children's Hospital Association.

| Code               | Type of code | Explanation                                             |
|--------------------|--------------|---------------------------------------------------------|
| Chest drainage     |              |                                                         |
| 0B9                | ICD-10-CM    | Drainage of respiratory system                          |
| 0H95               | ICD-10-CM    | Drainage of chest skin                                  |
| 0J96               | ICD-10-CM    | Drainage of subcutaneous tissue and fascia of chest     |
| 0W98               | ICD-10-CM    | Drainage of chest wall                                  |
| 0W99               | ICD-10-CM    | Drainage of pleural cavity, right                       |
| 0W9B               | ICD-10-CM    | Drainage of pleural cavity, left                        |
| 0W9C               | ICD-10-CM    | Drainage of mediastinum                                 |
| 0W9D               | ICD-10-CM    | Drainage of pericardium                                 |
| Oxygen             |              |                                                         |
| 521171             | CTC          | Oxygen therapy                                          |
| Intravenous fluids |              |                                                         |
| 146461             | CTC          | Dextrose and electrolytes                               |
| 146000             | CTC          | Electrolyte and replenishment agents unspecified        |
| 146040             | CTC          | Hyperalimentation solutions unspecified                 |
| 146435             | CTC          | Multiple electrolyte solutions                          |
| 146451             | CTC          | Dextrose and sodium chloride                            |
| 146218             | CTC          | Sodium chloride                                         |
| 146441             | CTC          | Sodium chloride and potassium chloride                  |
| 146041             | CTC          | Hyperalimentation solution and electrolyte combinations |
| Antibiotics        |              |                                                         |
| 121225             | CTC          | Ampicillin (anhydrous) (sodium) (trihydrate)            |
| 122231             | CTC          | Ceftriaxone sodium                                      |
| 121231             | CTC          | Ampicillin sodium and sulbactam sodium                  |
| 122421             | CTC          | Azithromycin (dihydrate)                                |
| 122211             | CTC          | Cefotaxime sodium                                       |
| 124143             | CTC          | Clindamycin (HCl) (palmitate) (phosphate)               |
| 124133             | CTC          | Vancomycin (HCl)                                        |
| 124164             | CTC          | Metronidazole (HCl)                                     |
| 123215             | CTC          | Levofloxacin                                            |
| 122252             | CTC          | Cefepime HCl                                            |
| 122221             | CTC          | Ceftazidime                                             |
| 121265             | CTC          | Piperacillin sodium and tazobactam sodium               |
| 121105             | CTC          | Gentamicin (sulfate)                                    |
| 121135             | CTC          | Tobramycin sulfate                                      |
| 122177             | CTC          | Cefuroxime (axetil) (sodium)                            |
| 124118             | CTC          | Meropenem                                               |
| 123115             | CTC          | Doxycycline (calcium) (hyclate) (monohydrate)           |
| 123131             | CTC          | Minocycline (HCl)                                       |
| 121101             | CTC          | Amikacin sulfate                                        |
| 123201             | CTC          | Ciprofloxacin (HCl)                                     |
| 124451             | CTC          | Sulfamethoxazole and trimethoprim (cotrimoxazole)       |
| 121217             | CTC          | Amoxicillin trihydrate                                  |
| 125303             | CTC          | Posaconazole                                            |

SUPPLEMENTAL TABLE 5 Continued

| Code   | Type of code | Explanation                                      |
|--------|--------------|--------------------------------------------------|
| 121221 | CTC          | Amoxicillin trihydrate and potassium clavulanate |
| 122202 | CTC          | Cefdinir                                         |
| 122271 | CTC          | Ceftaroline fosamil                              |
| 124147 | CTC          | Colistimethate sodium                            |
| 124137 | CTC          | Linezolid                                        |
| 124169 | CTC          | Rifaximin                                        |
| 122217 | CTC          | Cefpodoxime proxetil                             |
| 122401 | CTC          | Erythromycin                                     |
| 126105 | CTC          | Hydroxychloroquine sulfate                       |
| 121215 | CTC          | Penicillin V potassium                           |
| 126221 | CTC          | Isoniazid (INH) (isonicotinic acid hydrazide)    |
| 122173 | CTC          | Cefprozil (anhydrous)                            |
| 122115 | CTC          | Cephalexin (HCl) (monohydrate)                   |
| 122207 | CTC          | Cefixime                                         |
| 122425 | CTC          | Clarithromycin                                   |
| 121247 | CTC          | Nafcillin sodium                                 |
| 122275 | CTC          | Ceftazidime and avibactam                        |
| 125225 | CTC          | Fluconazole                                      |
| 129121 | CTC          | Pentamidine isethionate                          |
| 122109 | CTC          | Cefazolin sodium                                 |
| 129105 | CTC          | Dapsone (DDS)                                    |
| 125215 | CTC          | Caspofungin acetate                              |
| 126245 | CTC          | Rifampin                                         |
| 123225 | CTC          | Moxifloxacin HCl                                 |
| 125216 | CTC          | Micafungin sodium                                |
| 121251 | CTC          | Oxacillin sodium                                 |
| 122171 | CTC          | Cefoxitin sodium                                 |
| 126211 | CTC          | Ethambutol HCl                                   |
| 126235 | CTC          | Pyrazinamide                                     |
| 129111 | CTC          | Atovaquone                                       |
| 121115 | CTC          | Neomycin sulfate                                 |
| 124405 | CTC          | Sulfadiazine                                     |
| 125217 | CTC          | Voriconazole                                     |
| 121201 | CTC          | Penicillin G (aqueous) (potassium) (sodium)      |
| 125201 | CTC          | Amphotericin B                                   |
| 124121 | CTC          | Aztreonam                                        |
| 124138 | CTC          | Tedizolid phosphate                              |
| 129117 | CTC          | Nitazoxanide                                     |
| 126141 | CTC          | Atovaquone and proguanil HCl                     |
| 124145 | CTC          | Tigecycline                                      |
| 124123 | CTC          | Chloramphenicol (palmitate) (sodium succinate)   |
| 122241 | CTC          | Ceftolozane and tazobactam                       |
| 124105 | CTC          | Imipenem-cilastatin                              |
| 124113 | CTC          | Ertapenem sodium                                 |
| 124431 | CTC          | Sulfasalazine                                    |
| 125118 | CTC          | Methylene blue                                   |

**SUPPLEMENTAL TABLE 5** Continued

| Code                                         | Type of code | Explanation                                                                                 |
|----------------------------------------------|--------------|---------------------------------------------------------------------------------------------|
| 126251                                       | CTC          | Isoniazid and rifampin                                                                      |
| 122163                                       | CTC          | Cefotetan disodium                                                                          |
| 126101                                       | CTC          | Chloroquine                                                                                 |
| 126241                                       | CTC          | Rifabutin                                                                                   |
| 124129                                       | CTC          | Daptomycin                                                                                  |
| 121207                                       | CTC          | Penicillin G benzathine                                                                     |
| 126115                                       | CTC          | Primaquine phosphate                                                                        |
| 124185                                       | CTC          | Antibiotic combinations                                                                     |
| 122227                                       | CTC          | Ceftizoxime sodium                                                                          |
| 124131                                       | CTC          | Quinupristin/dalfopristin                                                                   |
| 122112                                       | CTC          | Cephradine                                                                                  |
| 121241                                       | CTC          | Dicloxacillin sodium                                                                        |
| 124103                                       | CTC          | Doripenem                                                                                   |
| 129113                                       | CTC          | Tinidazole                                                                                  |
| Vasoactive infusion                          |              |                                                                                             |
| 131321                                       | CTC          | Epinephrine                                                                                 |
| 131111                                       | CTC          | Milrinone lactate                                                                           |
| 131351                                       | CTC          | Norepinephrine bitartrate (levarterenol)                                                    |
| 131355                                       | CTC          | Phenylephrine HCl                                                                           |
| 131311                                       | CTC          | Dopamine HCl                                                                                |
| 131315                                       | CTC          | Ephedrine (sulfate)                                                                         |
| 131305                                       | CTC          | Dobutamine HCl                                                                              |
| Positive pressure ventilation and intubation |              |                                                                                             |
| 0BH17EZ                                      | ICD-10       | Insertion of endotracheal airway into trachea, via natural or artificial opening            |
| 0BH18EZ                                      | ICD-10       | Insertion of endotracheal airway into trachea, via natural or artificial opening endoscopic |
| Z9911                                        | ICD-10       | Dependence on respirator [ventilator] status                                                |
| 521162                                       | CTC          | Continuous positive airway pressure                                                         |
| 521164                                       | CTC          | Bilevel positive airway pressure                                                            |
| High Flow nasal cannula                      |              |                                                                                             |
| 521172                                       | CTC          | High Flow nasal cannula supportive therapy                                                  |

CTC, Clinical Transaction Classification.

**SUPPLEMENTAL TABLE 6** Definitions Used for Diagnostic Testing. Codes Are Clinical Transaction Classification (CTC) Codes Used by the Children's Hospital Association.

| CTC code                      | Name                                               |
|-------------------------------|----------------------------------------------------|
| Chest radiography             |                                                    |
| 433311                        | Chest PA and lateral radiograph                    |
| 433211                        | Chest anterior posterior (AP) radiograph           |
| 433411                        | Chest AP and lateral radiograph                    |
| 433011                        | Chest radiograph                                   |
| 433911                        | Other specified chest radiograph                   |
| 433111                        | Chest posterior anterior (PA) radiograph           |
| Chest computerized tomography |                                                    |
| 433051                        | Chest CT scan                                      |
| 473051                        | Chest arteriography CT scan                        |
| Chest ultrasonography         |                                                    |
| 433041                        | Chest ultrasound real-time                         |
| 433042                        | Chest ultrasound B-mode                            |
| 433241                        | Chest anterior posterior (AP) ultrasound real-time |
| 433040                        | Chest ultrasound                                   |
| Blood culture                 |                                                    |
| 361110                        | Aerobic cultures                                   |
| 361120                        | Anaerobic cultures                                 |
| 361130                        | Aerobic and anaerobic cultures                     |
| Complete blood count          |                                                    |
| 322220                        | CBC without differential                           |
| 322200                        | CBC unspecified                                    |
| 322210                        | CBC with differential                              |
| C-reactive protein            |                                                    |
| 344010                        | C-reactive protein                                 |
| 344011                        | hs-CRP                                             |
| Procalcitonin                 |                                                    |
| 316210                        | Calcitonin                                         |
| Viral testing                 |                                                    |
| 364151                        | Influenza A and B antibody                         |
| 364241                        | Respiratory syncytial virus antibody               |
| 382237                        | Influenza virus PCR                                |
| 382317                        | Respiratory syncytial virus PCR                    |
| 382318                        | Respiratory syncytial virus RT-PCR                 |
| 364150                        | Influenza virus unspecified                        |
| 364242                        | Respiratory syncytial virus antigen                |
| 364152                        | Influenza A and B antigen                          |
| 382240                        | Influenza virus DNA probe                          |
| 382238                        | Influenza virus RT-PCR                             |
| Respiratory culture           |                                                    |
| 361110                        | Aerobic cultures                                   |

CRP, C-reactive protein; CBC, complete blood count; CT, computed tomography; PCR, polymerase chain reaction; RT-PCR, reverse transcription polymerase chain reaction.

**SUPPLEMENTAL TABLE 7** Use of Antibiotics by Primary Diagnosis Among Patients Admitted on Their Index Visit (*n* = 37 154)

| Principal Diagnosis                                                                                        | No Antibiotics<br><i>N</i> (%) | Antibiotics<br><i>N</i> (%) |
|------------------------------------------------------------------------------------------------------------|--------------------------------|-----------------------------|
| <i>N</i>                                                                                                   | 5303                           | 34 223                      |
| Overall                                                                                                    | 3990 (10.7)                    | 33 164 (89.3)               |
| Viral pneumonia                                                                                            | 3511                           | 6665                        |
| Viral pneumonia, unspecified                                                                               | 2458 (54.4)                    | 2058 (45.6)                 |
| Respiratory syncytial virus pneumonia                                                                      | 366 (26.7)                     | 1003 (73.3)                 |
| Influenza due to other identified influenza virus with other specified pneumonia                           | 65 (7.1)                       | 848 (92.9)                  |
| Human metapneumovirus pneumonia                                                                            | 185 (20.5)                     | 718 (79.5)                  |
| Influenza due to other identified influenza virus with unspecified type of pneumonia                       | 51 (6.6)                       | 722 (93.4)                  |
| Other viral pneumonia                                                                                      | 198 (39.8)                     | 300 (60.2)                  |
| Influenza due to unidentified influenza virus with unspecified type of pneumonia                           | 24 (7)                         | 319 (93)                    |
| Influenza due to unidentified influenza virus with specified pneumonia                                     | 22 (8.4)                       | 241 (91.6)                  |
| Parainfluenza virus pneumonia                                                                              | 54 (23.8)                      | 173 (76.2)                  |
| Adenoviral pneumonia                                                                                       | 44 (19.8)                      | 178 (80.2)                  |
| Influenza due to other identified influenza virus with the same other identified influenza virus pneumonia | 44 (29.5)                      | 105 (70.5)                  |
| Likely bacterial pneumonia                                                                                 | 44 (0.6)                       | 7290 (99.4)                 |
| Unspecified bacterial pneumonia                                                                            | 38 (0.6)                       | 6430 (99.4)                 |
| Pneumonia due to <i>Streptococcus pneumoniae</i>                                                           | 3 (0.7)                        | 407 (99.3)                  |
| Pneumonia due to other streptococci                                                                        | 0 (0)                          | 158 (100)                   |
| Pneumonia due to other specified bacteria                                                                  | 3 (2.5)                        | 119 (97.5)                  |
| Pneumonia due to Methicillin resistant <i>Staphylococcus aureus</i>                                        | 0 (0)                          | 72 (100)                    |
| Pneumonia due to Methicillin susceptible <i>Staphylococcus aureus</i>                                      | 0 (0)                          | 56 (100)                    |
| Pneumonia due to other Gram-negative bacteria                                                              | 0 (0)                          | 27 (100)                    |
| Whooping cough due to <i>Bordetella pertussis</i> with pneumonia                                           | 0 (0)                          | 10 (100)                    |
| Whooping cough, unspecified species with pneumonia                                                         | 0 (0)                          | 5 (100)                     |
| Pneumonia due to <i>Klebsiella pneumoniae</i>                                                              | 0 (0)                          | 2 (100)                     |
| Whooping cough due to <i>Bordetella parapertussis</i> with pneumonia                                       | 0 (0)                          | 2 (100)                     |
| Whooping cough due to other <i>Bordetella</i> species with pneumonia                                       | 0 (0)                          | 2 (100)                     |
| Pneumonia of indeterminate etiology                                                                        | 435 (2.2)                      | 19 209 (97.8)               |
| Pneumonia, unspecified organism                                                                            | 375 (2.4)                      | 15 275 (97.6)               |
| Lobar pneumonia, unspecified organism                                                                      | 48 (1.5)                       | 3177 (98.5)                 |
| Other pneumonia, unspecified organism                                                                      | 5 (1.2)                        | 417 (98.8)                  |
| Pneumonia due to other specified infectious organisms                                                      | 5 (1.9)                        | 255 (98.1)                  |
| Bronchopneumonia, unspecified organism                                                                     | 2 (2.3)                        | 85 (97.7)                   |



**SUPPLEMENTAL TABLE 8** Demographics and Clinical Characteristics of Study Cohort by Severity Type.

| Variable                                    | Mild-Discharged  | Mild-Admitted    | Moderate         | Severe           |
|---------------------------------------------|------------------|------------------|------------------|------------------|
| <i>N</i>                                    | 85 488           | 8321             | 25 781           | 5590             |
| Demographics                                |                  |                  |                  |                  |
| Age, years                                  | 4.00 (2.00–7.00) | 3.00 (1.00–5.00) | 3.00 (1.00–5.00) | 2.00 (1.00–5.00) |
| Male sex                                    | 44 876 (52.5)    | 4344 (52.2)      | 13 163 (51.1)    | 3019 (54.0)      |
| Race and ethnicity                          |                  |                  |                  |                  |
| Non-Hispanic White                          | 27 372 (32.0)    | 3229 (38.8)      | 11 137 (43.2)    | 2432 (43.5)      |
| Non-Hispanic Black                          | 17 599 (20.6)    | 1849 (22.2)      | 4341 (16.8)      | 1303 (23.3)      |
| Hispanic                                    | 26 324 (30.8)    | 1714 (20.6)      | 6427 (24.9)      | 1012 (18.1)      |
| All others                                  | 11 924 (13.9)    | 1286 (15.5)      | 3332 (12.9)      | 729 (13.0)       |
| Missing                                     | 2269 (2.7)       | 243 (2.9)        | 544 (2.1)        | 114 (2.0)        |
| Geographic region                           |                  |                  |                  |                  |
| Midwest                                     | 20 556 (24.0)    | 1857 (22.3)      | 5893 (22.9)      | 1452 (26.0)      |
| Northeast                                   | 9493 (11.1)      | 1858 (22.3)      | 2244 (8.7)       | 671 (12.0)       |
| South                                       | 32 065 (37.5)    | 3045 (36.6)      | 11 276 (43.7)    | 2424 (43.4)      |
| West                                        | 23 374 (27.3)    | 1561 (18.8)      | 6368 (24.7)      | 1043 (18.7)      |
| Primary source of payment                   |                  |                  |                  |                  |
| Public                                      | 53 189 (62.2)    | 4493 (54.0)      | 13 841 (53.7)    | 3016 (54.0)      |
| Private                                     | 25 498 (29.8)    | 3392 (40.8)      | 10 627 (41.2)    | 2317 (41.4)      |
| Other or unknown                            | 6801 (8.0)       | 436 (5.2)        | 1313 (5.1)       | 257 (4.6)        |
| Weekend encounter                           | 23 020 (26.9)    | 2282 (27.4)      | 7045 (27.3)      | 1525 (27.3)      |
| Diagnostic testing                          |                  |                  |                  |                  |
| Chest radiography                           | 70 571 (82.6)    | 6419 (77.1)      | 20 910 (81.1)    | 4975 (89.0)      |
| Chest computerized tomography               | 188 (0.2)        | 109 (1.3)        | 352 (1.4)        | 434 (7.8)        |
| Chest ultrasound                            | 118 (0.1)        | 74 (0.9)         | 746 (2.9)        | 679 (12.1)       |
| Blood culture                               | 6688 (7.8)       | 2437 (29.3)      | 11 424 (44.3)    | 2909 (52.0)      |
| Complete blood count                        | 10 683 (12.5)    | 3730 (44.8)      | 15 569 (60.4)    | 4221 (75.5)      |
| C-reactive protein                          | 5567 (6.5)       | 1851 (22.2)      | 8610 (33.4)      | 2547 (45.6)      |
| Procalcitonin                               | 559 (0.7)        | 254 (3.1)        | 1694 (6.6)       | 671 (12.0)       |
| Viral testing                               | 10 454 (12.2)    | 2066 (24.8)      | 6927 (26.9)      | 1943 (34.8)      |
| Respiratory culture                         | 113 (0.1)        | 33 (0.4)         | 110 (0.4)        | 234 (4.2)        |
| Treatment                                   |                  |                  |                  |                  |
| Given antibiotics <sup>a</sup>              | 30 485 (35.7)    | 6673 (80.2)      | 22895 (88.8)     | 5009 (89.6)      |
| Encounter length of stay, days <sup>b</sup> | 1 (1–1)          | 1 (1–2)          | 2 (1–3)          | 4 (2–6)          |

Numbers in parenthesis represent percent or interquartile range.

<sup>a</sup> Defined as ordering of oral or intravenous antibiotics at any time during encounter, not including antibiotics prescribed at discharge.

<sup>b</sup> Among admitted patients, taking the longer admission from the index or revisit (where applicable) per encounter.
